# Supplementary material
Source: PubMed Central journal article supplement (PMC6064678)
Supplement: NIHMS938597-supplement.pdf [file NIHMS938597-supplement.pdf]

## Supporting Information

### **Screening One Bead One Compound Libraries Against Serum Using a Flow Cytometer: Determination of the Minimum Antibody Concentration Required for Ligand Discovery**

Osayemwenre Erharuyi<sup>†</sup>, Scott Simanski, Patrick J. McEnaney and Thomas Kodadek<sup>\*</sup>

Department of Chemistry, The Scripps Research Institute, 130 Scripps Way, Jupiter, Florida 33458, U.S.A.

<sup>†</sup>Current Address: Department of Pharmaceutical Chemistry, Faculty of Pharmacy, University of Benin, Benin City, Nigeria.

#### **Corresponding Author**

\*E-mail: [kodadek@scripps.edu](mailto:kodadek@scripps.edu)

## **Materials**

All chemicals and solvents were of commercial source and used without further purification. All steps involving water utilized distilled water filtered through a Barnstead Nanopure filtration system (Thermo Scientific).

## **EXPERIMENTAL PROCEDURES**

### **Ligand synthesis**

The FLAG peptides were synthesized on 10  $\mu\text{m}$  TentaGel M  $\text{NH}_2$  resin (0.50 g, 0.21 mmol/g, loading,  $\sim 1.95 \times 10^9$  beads/g, catalog no. M30102, Rapp-Polymere, Tübingen, Germany). The beads were swollen in dimethylformamide (DMF) for 2 h before use. DMF was used as the solvent unless otherwise mentioned. For synthesis of the peptides, Fmoc-methionine-OH (5 mol. equiv./g bead) was anchored to beads using HOBt (1-hydroxybenzotriazole) (5 mol. equiv./g), HBTU [2-(1H-benzotriazole-1-yl)-1,1,3,3-tetramethyluroniumhexafluorophosphate] (5 mol. equiv./g), and N,N-diisopropylethylamine (DIEA) (5 mol. equiv./g) overnight. This was followed by Fmoc deprotection using 20% piperidine in DMF first for 5 min, washed with DMF and then for 20 min. Following the methionine coupling, the PEG 2-[2-(Fmoc-amino)-ethoxy]-ethoxy acetic acid linker and all Fmoc amino acid residues were coupled following peptide/amide bond formation procedure as previously described.<sup>10</sup> The final sequences for the peptides FLAG and FLAG-D4H were DYKDDDDK and DYKHNNYN respectively. KMS31 was synthesized as described previously,<sup>22</sup> but using 10  $\mu\text{m}$  TentaGel beads.

### **Protein concentration determination**

Total serum protein was determined spectrophotometrically using a Nanodrop instrument. Total IgG concentration was determined using the Ready-SET-Go ELISA kit (eBioscience).

### **Preparation of fluorescein-labeled beads**

10  $\mu\text{m}$  TentaGel beads were partitioned to protect the surface accessible amines with Fmoc using the procedure previously described.<sup>18,28</sup> Briefly, TentaGel 10  $\mu\text{m}$  beads (5 mg, 0.23 mol/g) were incubated in water (12 h, RT). Beads were centrifuged (1 min, 500 x g) and the supernatant decanted. Fmoc-OSu (1.9 mg, 0.5 equiv.) was dissolved in 2.5 mL of a 1:1 mixture of diethyl

ether:dichloromethane (DCM). The solution was added to bead aliquots in a 5 mL centrifuge tube followed by extensive mixing (vortex 30 s, sonicate 30 s, vortex 30 s) and incubated (20 min, room temperature, rotating). The sample was centrifuged (500 x g, 1 min), washed (4x DMF) and re-equilibrated in DMF (3 h, RT, rotating).

To 1 mg of partitioned beads generated above Fluorescein-N-hydroxysuccinimide (Fluorescein-NHS) (211 nM, 150  $\mu$ L, 0.032 nmols) in DMF with 1% TMP was added and incubated shaking (2 h, 37°C). Following labeling the beads were washed (3x DMF, 3x DCM, 1x DMF). After interior fluorescent labeling 0.05 mg of 160  $\mu$ m TentaGel beads (0.43 mmol/g) were added as a synthesis control. The exterior Fmoc protecting group removed (20% piperidine in DMF, 5 min RT, 15 min RT).

### **Expression and purification of CLL BCR IgG**

The cloning, expression, and purification of the monoclonal antibody was performed as described<sup>29</sup>. Briefly, CLL014 monoclonal antibody was expressed as the IgG1 isotype from light chain (pIgG-lambda) and heavy chain (pIgG-gamma) expression plasmids. Heavy and light chain variable gene segments from CLL014 clones were amplified and sub-cloned into expression plasmids to construct pIgGlamba, or pIgG-gamma. The mammalian expression vectors were transiently transfected into HEK 293T cells (ATCC, CRL-11268) with OMNifect transfection reagent (transomic technologies, cat. no. OTR1003). Transfected HEK 293T cells were cultured in X-vivo serum-free medium (Lonza, cat. no. 04-743Q) at 37°C in 5% CO<sub>2</sub> after adding neutridoma-SP (Roche, cat. no. 11011375001) (250  $\mu$ L per 150 T culture flask). Following 5 days of transfection, the medium was collected after centrifugation (1000 x g, 10 min) to remove cells, the supernatants was incubated with recombinant Protein G beads overnight at 4°C (30  $\mu$ L of packed beads per 50 mL of media). The beads were loaded into a 20mL affinity column (20mL of 100 mM Tris-HCl (pH 8.0) was used for column equilibration and washing) and eluted with IgG elution buffer following the manufacturer's instruction (Thermo Fischer Scientific, cat. no. 21004), and 1 M Tris-HCl (pH 9.0) was used for immediate neutralization. The neutralized eluate was concentrated with a 30 kDa cutoff centrifugal filter devices (Millipore) and dialyzed into 1xPBS. Purified CLL014 monoclonal antibodies were stored at -20 °C until use.

### **Antibody Incubations and Flow Cytometric Analysis**

TentaGel beads displaying FLAG peptide and Fluorescein labeled beads were equilibrated in water for 2 h, followed by overnight incubation in 1X PBS containing 0.05% Tween 20. The beads were then incubated with the blocking buffer, PBS starting block (Thermo Scientific, cat. no. 37538) for 2 hours. After incubation in blocking buffer, approximately 1,000 of beads displaying FLAG peptide were doped into approximately 10,000 of fluorescein labeled beads. The bead mixture was added to mouse serum (45 mg/mL total protein, 18.1 mg/mL total IgG; Immunoreagents, Inc., Raleigh, NC, cat. no. SP-002-VX5) that had been diluted 250-fold into PBST buffer, the final volume was 200  $\mu$ L. To this solution was added monoclonal anti-FLAG M2 antibody (Sigma-Aldrich, cat. no. F3165) to give the desired final concentration. After incubating for 1 h at 4°C with rotation, the supernatant was removed (by brief centrifugation and decanting) and the beads were washed three times with PBST. The beads were then incubated with Alexa Fluor 647-labeled chicken anti-mouse IgG antibody (Invitrogen, cat. no. A21463) diluted 1:200 in blocking buffer 1 h at 4°C with rotation. After washing three times with PBST, the beads were re-suspended in PBST (200  $\mu$ L) and transferred to FACS tubes.

The fluorescence intensities were measured using a flow cytometer (BD FACS Canto II, BD Bioscience).

The same procedure was repeated for the FLAG-D4H peptide.

For the KMS31 beads, the same protocol was followed except human serum obtained from a healthy volunteer (59 mg/mL total protein, 3.9 mg/mL total IgG) was substituted for the mouse serum, CLL014 IgG was doped into the sample and Alexafluor 647-labeled goat anti-human IgG (Invitrogen, cat. no. A21445) diluted 1:200 in blocking buffer was used to stain the beads.

## Supplementary Figures

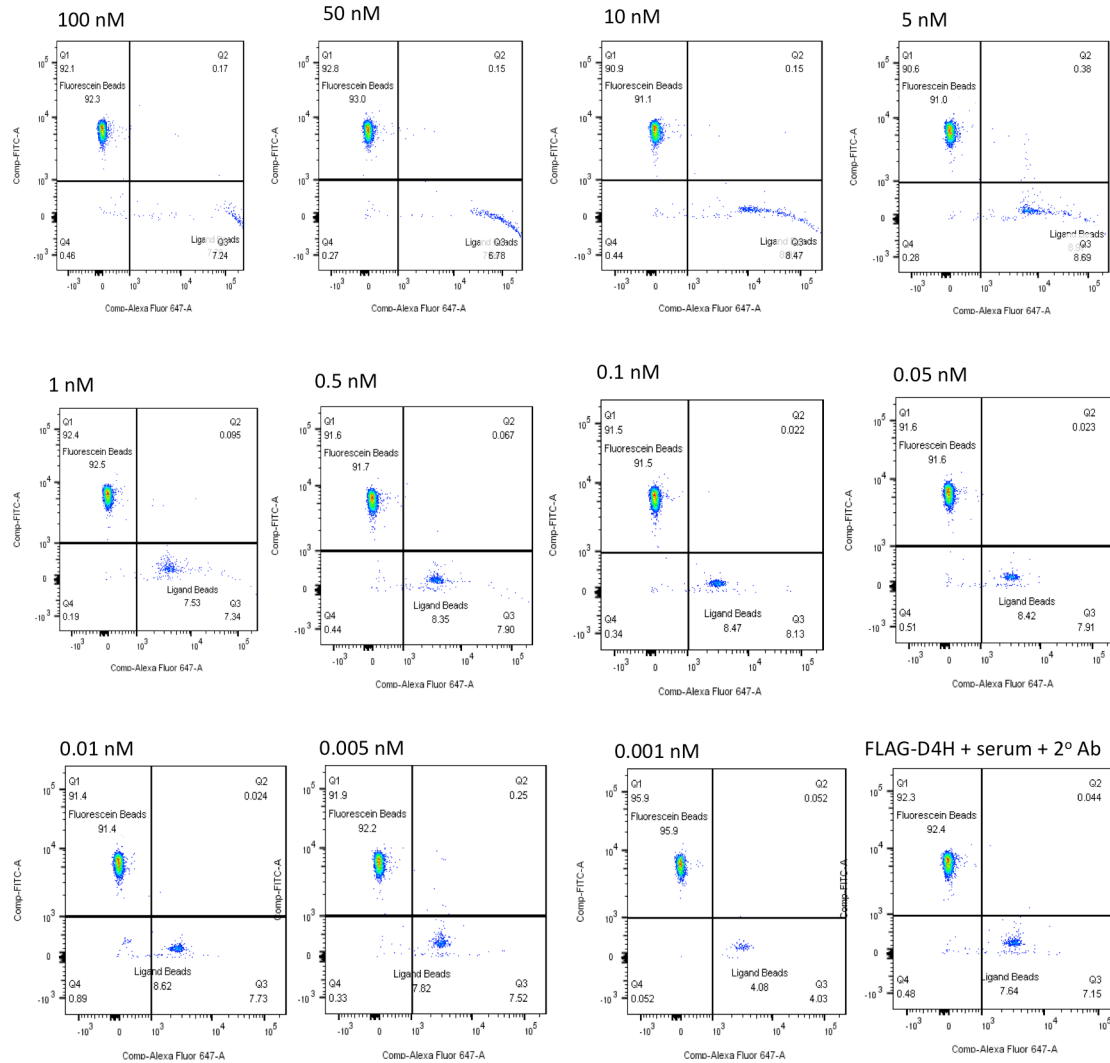

**Figure S1: FACS Dot plots of FLAG-D4H against Anti-FLAG Ab in mouse serum. The concentration of the anti-FLAG antibody doped into the serum is shown above each plot.**

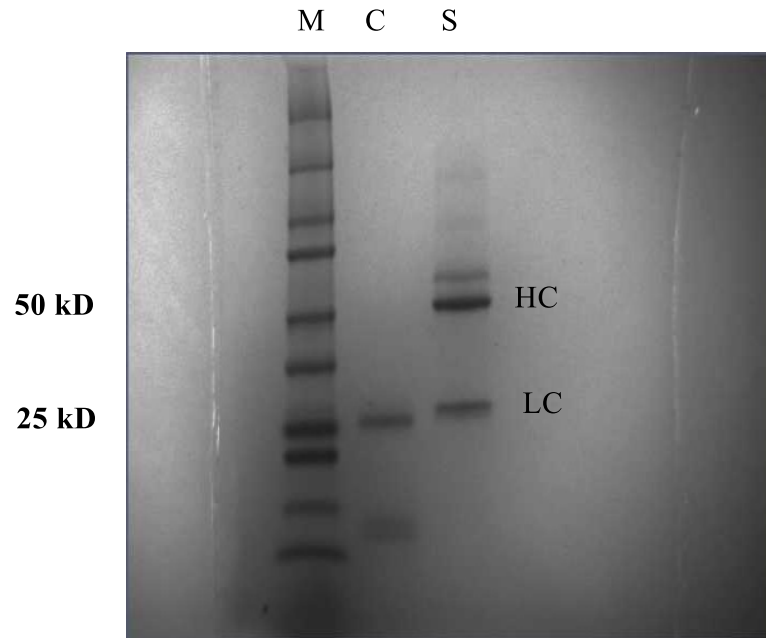

**Figure S2: SDS PAGE of purified CLL014 monoclonal antibody. 10  $\mu$ L of a 1:5 mixture of sodium dodecylsulphate (SDS) and purified antibody was added to each lane of a polyacrylamide gel in the electrophoresis tank, and run for 30 minutes at 200 V. Protein was detected using commassie stain. (M) Marker lane, (C) control lane, (S) sample lane. HC = Heavy chain, LC = Light Chain.**

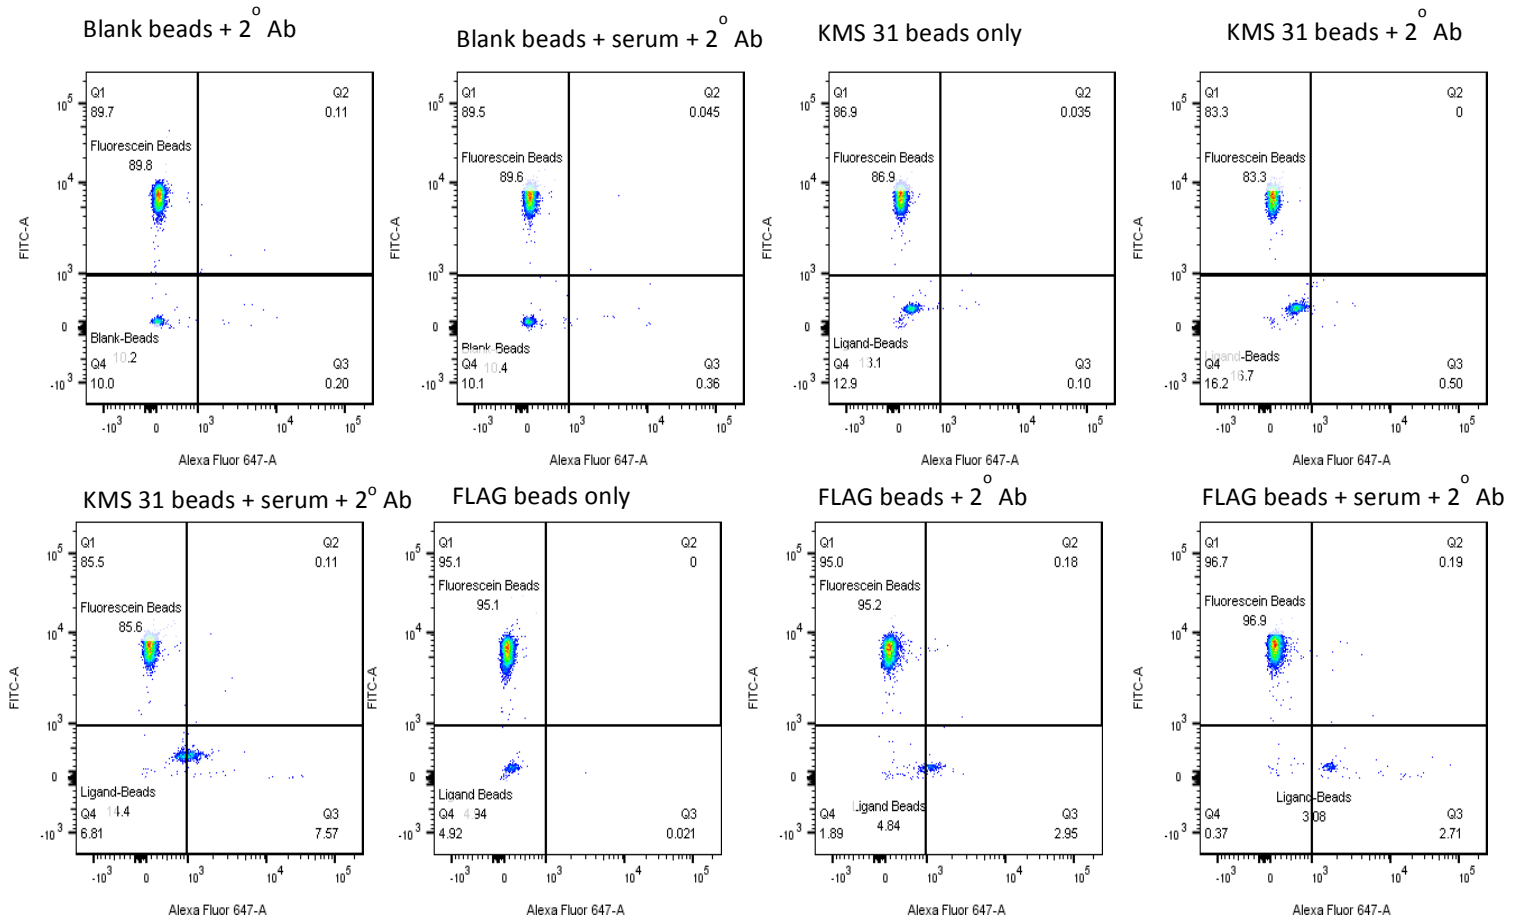

Figure S3: FACS Dot plots for the control experiments.

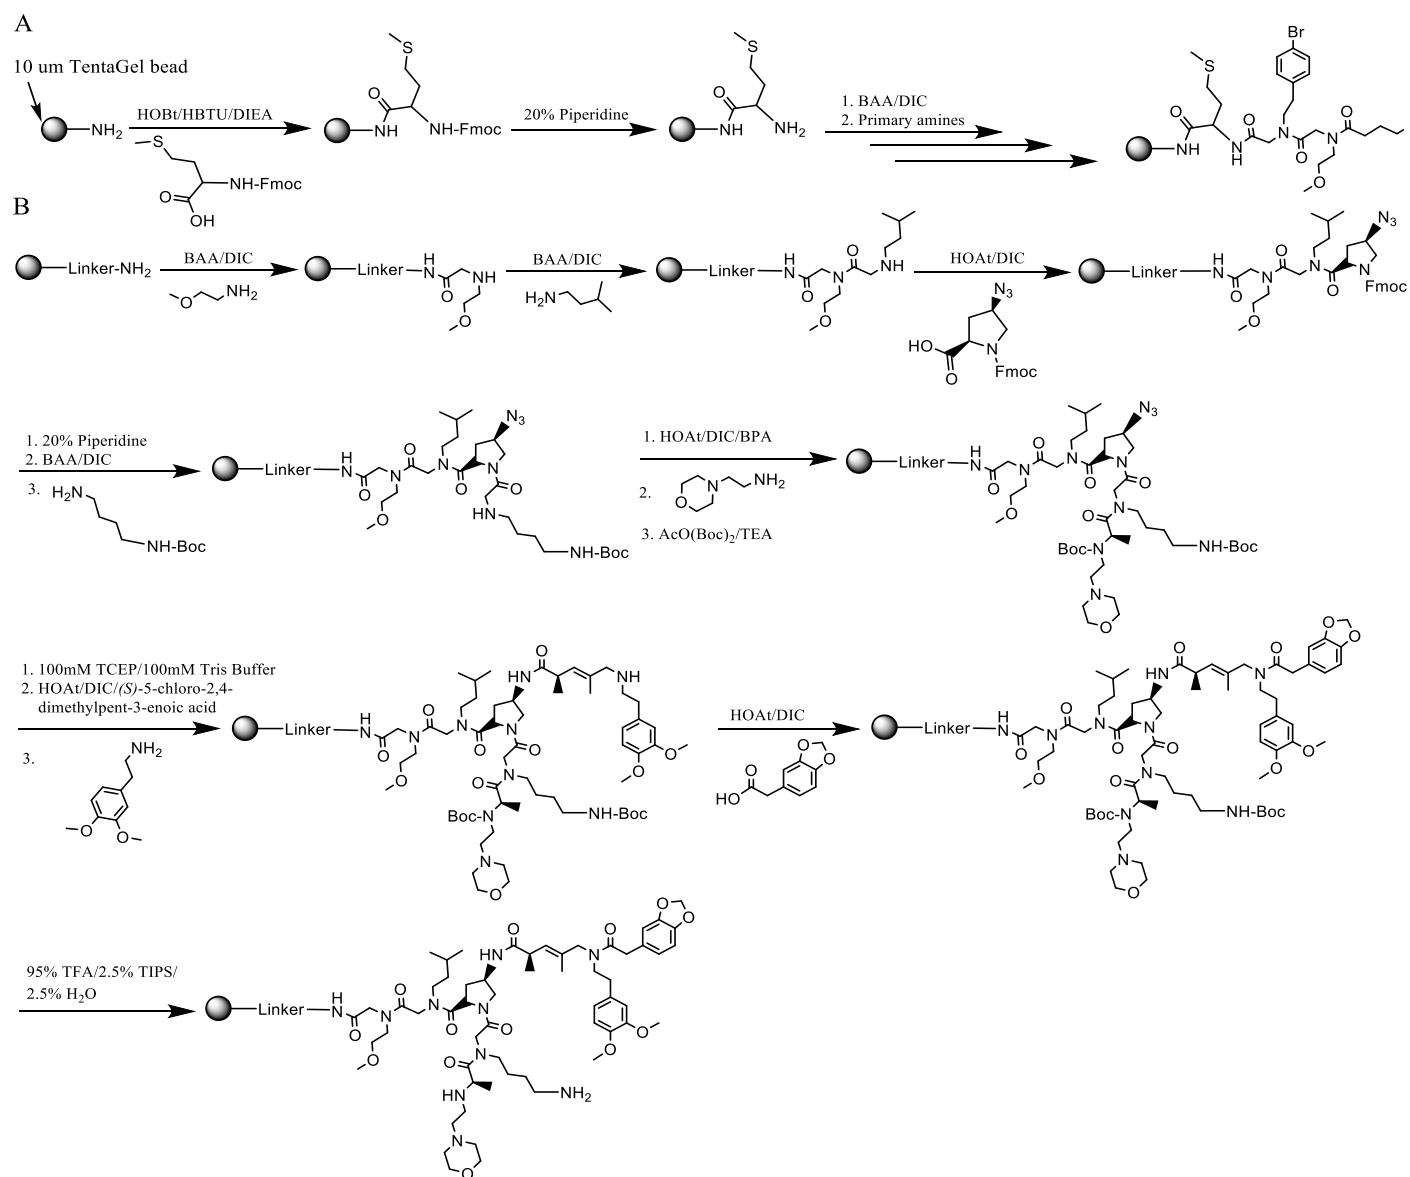

**Figure S4: Synthetic scheme for KMS31.**



## Supplementary Tables

**Table S1: Flow statistics of Anti-FLAG-FLAG Peptide Binding**

| Conc. of Anti-FLAG (nM) | Subset Name      | Count | Freq. of Total | Freq. of Parent | Mean FITC FI | Mean Alexa Fluor 647 FI |
|-------------------------|------------------|-------|----------------|-----------------|--------------|-------------------------|
| 0.001                   | Fluorescein Bead | 4818  | 48.2           | 95.8            | 5982         | 177                     |
|                         | Ligand-Bead      | 209   | 2.09           | 4.16            | 133          | 5365                    |
| 0.005                   | Fluorescein Bead | 4292  | 48.0           | 95.5            | 5921         | 187                     |
|                         | Ligand-Bead      | 204   | 2.28           | 4.54            | 132          | 13950                   |
| 0.01                    | Fluorescein Bead | 5162  | 51.6           | 97.3            | 5987         | 178                     |
|                         | Ligand-Bead      | 142   | 1.42           | 2.68            | 139          | 40088                   |
| 0.05                    | Fluorescein Bead | 4877  | 48.8           | 96.1            | 6025         | 178                     |
|                         | Ligand-Bead      | 193   | 1.93           | 3.80            | 145          | 138378                  |
| 0.1                     | Fluorescein Bead | 4782  | 47.8           | 94.8            | 5962         | 180                     |
|                         | Ligand-Bead      | 262   | 2.62           | 5.19            | 141          | 188355                  |
| 0.5                     | Fluorescein Bead | 4870  | 48.7           | 94.7            | 6165         | 182                     |
|                         | Ligand-Bead      | 272   | 2.72           | 4.28            | 185          | 188601                  |
| 1                       | Fluorescein Bead | 4850  | 48.5           | 95.8            | 5937         | 185                     |
|                         | Ligand-Bead      | 211   | 2.11           | 4.17            | 150          | 238361                  |
| 5                       | Fluorescein Bead | 4679  | 46.8           | 95.5            | 5984         | 184                     |
|                         | Ligand-Bead      | 218   | 2.18           | 4.45            | 133          | 261417                  |
| 10                      | Fluorescein Bead | 4903  | 49.0           | 96.8            | 6096         | 186                     |
|                         | Ligand-Bead      | 159   | 1.59           | 3.14            | 167          | 261417                  |
| 50                      | Fluorescein Bead | 4329  | 43.3           | 95.6            | 5998         | 191                     |
|                         | Ligand-Bead      | 197   | 1.97           | 4.35            | 149          | 261417                  |
| 100                     | Fluorescein Bead | 4611  | 46.1           | 95.8            | 5993         | 185                     |
|                         | Ligand-Bead      | 199   | 1.99           | 4.14            | 135          | 261417                  |

**Table S2: Flow statistics of Anti-FLAG-FLAG-D4H Binding**

| <b>Conc. of Anti-FLAG (nM)</b> | <b>Subset Name</b> | <b>Count</b> | <b>Freq. of Total</b> | <b>Freq. of Parent</b> | <b>Mean FITC FI</b> | <b>Mean Alexa Fluor 647 FI</b> |
|--------------------------------|--------------------|--------------|-----------------------|------------------------|---------------------|--------------------------------|
| 0.001                          | Fluorescein Bead   | 3575         | 44.5                  | 89.8                   | 5596                | 136                            |
|                                | Ligand-Bead        | 326          | 4.06                  | 8.19                   | 268                 | 2648                           |
| 0.005                          | Fluorescein Bead   | 3738         | 46.5                  | 88.6                   | 5618                | 128                            |
|                                | Ligand-Bead        | 373          | 4.64                  | 8.85                   | 175                 | 2004                           |
| 0.01                           | Fluorescein Bead   | 3880         | 43.6                  | 89.2                   | 5644                | 133                            |
|                                | Ligand-Bead        | 381          | 4.28                  | 8.76                   | 174                 | 2495                           |
| 0.05                           | Fluorescein Bead   | 4042         | 45.5                  | 89.5                   | 5626                | 131                            |
|                                | Ligand-Bead        | 388          | 4.36                  | 8.59                   | 177                 | 2610                           |
| 0.1                            | Fluorescein Bead   | 4873         | 48.7                  | 87.8                   | 5644                | 128                            |
|                                | Ligand-Bead        | 519          | 5.19                  | 9.35                   | 234                 | 2464                           |
| 0.5                            | Fluorescein Bead   | 4090         | 42.5                  | 89.3                   | 5670                | 135                            |
|                                | Ligand-Bead        | 398          | 4.13                  | 8.69                   | 190                 | 3266                           |
| 1                              | Fluorescein Bead   | 3848         | 42.5                  | 90.2                   | 5697                | 137                            |
|                                | Ligand-Bead        | 331          | 3.65                  | 7.76                   | 246                 | 4354                           |
| 5                              | Fluorescein Bead   | 3810         | 45.2                  | 88.9                   | 5653                | 143                            |
|                                | Ligand-Bead        | 391          | 4.63                  | 9.12                   | 188                 | 8745                           |
| 10                             | Fluorescein Bead   | 4104         | 48.6                  | 88.3                   | 5660                | 134                            |
|                                | Ligand-Bead        | 455          | 5.39                  | 9.78                   | 169                 | 12041                          |
| 50                             | Fluorescein Bead   | 3575         | 37.6                  | 89.2                   | 5660                | 139                            |
|                                | Ligand-Bead        | 366          | 3.84                  | 9.13                   | 192                 | 57551                          |
| 100                            | Fluorescein Bead   | 3707         | 43.1                  | 89.5                   | 5665                | 135                            |
|                                | Ligand-Bead        | 340          | 3.95                  | 8.21                   | 176                 | 117659                         |

**Table S3: Flow statistics of CLL 014-KMS Binding**

| <b>Conc. of CLL 014 (nM)</b> | <b>Subset Name</b> | <b>Count</b> | <b>Freq. of Total</b> | <b>Freq. of Parent</b> | <b>Mean FITC FI</b> | <b>Mean Alexa Fluor 647 FI</b> |
|------------------------------|--------------------|--------------|-----------------------|------------------------|---------------------|--------------------------------|
| 0.01                         | Fluorescein Bead   | 4459         | 44.6                  | 84.8                   | 6501                | 182                            |
|                              | Ligand-Bead        | 800          | 8.00                  | 15.2                   | 372                 | 1285                           |
| 0.05                         | Fluorescein Bead   | 4339         | 43.4                  | 85.9                   | 6459                | 176                            |
|                              | Ligand-Bead        | 711          | 7.11                  | 14.1                   | 341                 | 1200                           |
| 0.1                          | Fluorescein Bead   | 4051         | 40.5                  | 86.0                   | 6501                | 177                            |
|                              | Ligand-Bead        | 657          | 6.57                  | 14.0                   | 370                 | 1311                           |
| 0.5                          | Fluorescein Bead   | 4188         | 41.9                  | 86.7                   | 6515                | 190                            |
|                              | Ligand-Bead        | 645          | 6.45                  | 13.3                   | 402                 | 1507                           |
| 1                            | Fluorescein Bead   | 3959         | 39.6                  | 86.6                   | 6483                | 170                            |
|                              | Ligand-Bead        | 611          | 6.11                  | 13.4                   | 334                 | 1057                           |
| 5                            | Fluorescein Bead   | 4330         | 43.3                  | 85.7                   | 6473                | 172                            |
|                              | Ligand-Bead        | 722          | 7.22                  | 14.3                   | 319                 | 2108                           |
| 10                           | Fluorescein Bead   | 4076         | 40.8                  | 85.2                   | 6438                | 157                            |
|                              | Ligand-Bead        | 705          | 7.05                  | 14.7                   | 388                 | 2094                           |
| 50                           | Fluorescein Bead   | 4081         | 40.8                  | 87.4                   | 6422                | 197                            |
|                              | Ligand-Bead        | 589          | 5.89                  | 12.6                   | 328                 | 10238                          |
| 100                          | Fluorescein Bead   | 4456         | 44.6                  | 85.9                   | 6466                | 188                            |
|                              | Ligand-Bead        | 729          | 7.29                  | 14.1                   | 322                 | 14570                          |
